1 **TITLE PAGE**

2

3 **Article Title:**

4 **Actigraphy Informs Distinct Patient-Centered Outcomes in Pre-COPD**

5

6 **Running Head:**

7 Actigraphy in assessment of pre-COPD

8

9 **Author List:**

10 Lemlem Weldemichael, MD <sup>1,2,3</sup> \*, Jianhong Chen, MS <sup>1,2,3</sup> \*, Brian Giang, BA <sup>4</sup>, Jeroen Geerts,  
11 MD <sup>5</sup>, Siyang Zeng, MS <sup>3,6</sup>, Wendy Czerina Ching, BS <sup>1,2,3</sup>, Melissa Nishihama, BS <sup>1,2,3</sup>, Warren  
12 M Gold, MD <sup>1,3</sup>, Mehrdad Arjomandi, MD <sup>1,2,3</sup>

13

14 <sup>1</sup>Division of Pulmonary, Critical Care, Allergy and Immunology, and Sleep Medicine,  
15 Department of Medicine, University of California, San Francisco, California, USA

16 <sup>2</sup>Division of Occupational and Environmental Medicine; Department of Medicine, University of  
17 California, San Francisco, California, USA

18 <sup>3</sup>San Francisco Veterans Affairs Medical Center; San Francisco; California, USA

19 <sup>4</sup>George Washington University, School of Medicine, Washington, DC, USA

20 <sup>5</sup>Radboud University Medical Center, Nijmegen, the Netherlands

21 <sup>6</sup>University of Washington, School of Public Health, Seattle, WA, USA

22

23 \* These authors contributed equally to this work.

24

25 **Email Addresses:**

26 LW: weldemichael.lemlem@gmail.com

27 JC: jianhong.chen@ucsf.edu

28 BG: briangiang@gwmail.gwu.edu

29 JG: jeroengeerts@msn.com

30 SZ: Siyang.zeng@ucsf.edu

31 WCC: Wendy.Ching@ucsf.edu

32 MN: mynishihama@gmail.com

33 WMG: warren.gold@ucsf.edu

34 MA: mehrdad.arjomandi@ucsf.edu

35

36 **Corresponding Author Information:**

37 **Mehrdad Arjomandi, MD**

38 Division of Pulmonary and Critical Care Medicine

39 University of California San Francisco

40 San Francisco Veterans Affairs Medical Center

41 Bldg 203, Room 3A-128, Mailstop 111-D

42 4150 Clement Street, San Francisco, CA 94121

43 TEL: (415) 221-4810 x24393

44 FAX: (415) 379-5538

45 EMAIL: mehrdad.arjomandi@ucsf.edu

46

47 **Keywords:** Actigraphy; machine learning; secondhand tobacco smoke; COPD; pre-COPD; air  
48 trapping; cardiopulmonary exercise; pulmonary function testing.

49

50 **Contributions:**

51 Conceived and designed the experiments: WMG, MA.

52 Developed study protocols: WCC, WMG, MA.

53 Collected data: LW, JG, BG, WCC, MN, WMG, MA.

54 Analyzed and interpreted data: LW, JC, JG, BG, SZ, MA.

55 Prepared the manuscript: LW, JC, BG, SZ, MA.

56 Edited the manuscript: LW, JC, JG, BG, SZ, WCC, MN, WMG, MA.

57 Obtained funding: JG, WMG, MA.

58

59 **Funding:**

60 This work was supported by:

61 1. Flight Attendant Medical Research Institute (012500WG to WMG and CIA190001 to MA).

- 62 2. California Tobacco-Related Disease Research Program (TRDRP) (T29IR0715 to MA).  
63 3. The Department of Veterans Affairs Airborne Hazard and Burn Pit Center of Excellence (to  
64 MA).  
65 4. Radboud University School of Medicine Scholarship (to JG).

66  
67 The funder had no role in study design, data collection and analysis, decision to publish, or  
68 preparation of the manuscript. The statements and conclusions in this publication are those of the  
69 authors and not necessarily those of the funding agency. The mention of commercial products,  
70 their source, or their use in connection with the material reported herein is not to be construed as  
71 an actual or implied endorsement of such products.

72

73 **Competing Interests:**

74 There are no competing interests for any author.

75

76 **Acknowledgements:**

77 We would like to thank Oliver Beech, Patricia Emerson-Healy, Emily Ghio, Liane Tolang, and  
78 Charlotte M Hunt for help with performance of cardiopulmonary exercise testing. We also would  
79 like to appreciate the contribution of the flight attendants who took time out of their busy  
80 schedules to participate as research subjects in this study.

81

82 **What is the key question?**

83 How do real-world activity monitoring outputs correlate with in-laboratory measures of  
84 cardiopulmonary function or respiratory symptoms?

85

86 **What is the bottom line?**

87 Actigraphy provided distinct information about functionality and daily physical activity that was  
88 not captured by in-laboratory lung function, exercise testing, or standardized respiratory  
89 questionnaires.

90

91 **Why read on?**

92 Although in-laboratory functional assessments are helpful in evaluating functional *capacity*,  
93 actigraphy may be more informative of the real-world functional *status*, and may serve as an  
94 additional objective patient-centered outcome in observational and interventional studies aiming  
95 to assess functionality.

96

97 **ABSTRACT**

98 **Background**-Actigraphy can clarify useful patient-centered outcomes for quantification of  
99 physical activity in the “real-world” setting.

100 **Methods**-To characterize the relationship of actigraphy outputs with “in-laboratory” measures of  
101 cardiopulmonary function and respiratory symptoms in pre-COPD, we obtained actigraphy data  
102 for 8 hours/day for 5 consecutive days a week before in-laboratory administration of respiratory  
103 questionnaires, PFT, and CPET to a subgroup of subjects participating in the larger study of the  
104 health effects of exposure to secondhand tobacco smoke who had air trapping but no spirometric  
105 obstruction (pre-COPD). Using machine learning approaches, we identified the most relevant  
106 actigraphy predictors and examined their associations with symptoms, lung function, and  
107 exercise outcomes.

108 **Results**-Sixty-one subjects (age=66±7years; BMI=24±3kg/m<sup>2</sup>; FEV<sub>1</sub>/FVC=0.75±0.05;  
109 FEV<sub>1</sub>=103±17%predicted) completed the nested study. In the hierarchical cluster analysis, the  
110 activity, distance, and energy domains of actigraphy, including moderate to vigorous physical  
111 activity, were closely correlated with each other, but were only loosely associated with  
112 spirometric and peak exercise measures of oxygen consumption, ventilation, oxygen-pulse, and  
113 anaerobic threshold (VO<sub>2AT</sub>), and were divergent from symptom measures. Conversely, the  
114 sedentary domain clustered with respiratory symptoms, air trapping, airflow indices, and  
115 ventilatory efficiency. In Regression modeling, sedentary domain was inversely associated with  
116 baseline lung volumes and tidal breathing at peak exercise, while the activity domains were  
117 associated with VO<sub>2AT</sub>. Respiratory symptoms and PFT data were not associated with actigraphy  
118 outcomes.

119 **Discussion**-Outpatient actigraphy can provide information for “real-world” patient-centered  
120 outcomes that are not captured by standardized respiratory questionnaires, lung function, or  
121 exercise testing. Actigraphy activity and sedentary domains inform of distinct outcomes.

122

## 123 INTRODUCTION

124 The ability to assess and quantify the physical activity levels of patients can offer  
125 valuable insights into their general health and day-to-day functioning that may not be captured  
126 by traditional objective measurements of disease status, such as interview- or questionnaire-  
127 based evaluations or physiological or laboratory testing.<sup>1-3</sup> Wearable activity monitors that  
128 measure “real-world” physical activity levels may thus serve as objective and reliable tools to  
129 assess health status and disease activity.<sup>4-7</sup> The current-generation wearable activity monitors,  
130 including pedometers and accelerometers, are transforming the field of biomedical research by  
131 their capacity to approximate free-living conditions and measure real-world physical activity in a  
132 continuous and longitudinal, yet objective manner.<sup>8</sup> However, the correlation between physical  
133 activity measurements obtained by actigraphy and the physical activity outcomes measured by  
134 physiologic and questionnaire-based tools has not been clearly identified.

135 In this study, we aimed to understand the relationship between physical activity measures  
136 obtained from a wearable activity monitor and those obtained from standardized respiratory  
137 questionnaires and “in-laboratory” lung function and exercise testing. We hypothesized that  
138 “real-world” actigraphy provides distinct outcomes that are not completely captured by  
139 standardized symptom questionnaires or traditional “in-laboratory” functional assessments. To  
140 assess this hypothesis, we examined the association of outpatient actigraphy measures with  
141 patient-reported respiratory physical activity and symptoms as well as lung function and exercise  
142 test results in a never-smoker cohort subgroup of a study on the health effects of exposure to  
143 secondhand tobacco smoke (SHS); the participants were at risk for COPD due to their prolonged  
144 occupational exposure to SHS but showed preserved spirometry.

145



## 146 **METHODS**

### 147 Study overview

148           This observational study was nested in a larger study examining the cardiopulmonary  
149 health effects of SHS exposure in a cohort of nonsmoking individuals with a range of  
150 occupational SHS exposure, as previously described.<sup>9</sup> Briefly, between July 2007 and March  
151 2020, we recruited US airline flight crewmembers with a history of occupational exposure to  
152 SHS, along with nonsmoker controls without such occupational exposure, who were  
153 participating in a larger study of the cardiopulmonary health effects of prolonged exposure to  
154 SHS (ClinicalTrials.gov Identifier: NCT02797275). The participants underwent respiratory  
155 symptom questionnaire assessments, full pulmonary function testing (PFT), and maximum-effort  
156 cardiopulmonary exercise testing (CPET). For the actigraphy nested study, beginning February  
157 2014, participants were asked to wear an activity monitor eight hours a day for five consecutive  
158 days during the week before they came in for in-laboratory evaluation and maintain a daily diary.  
159 The actigraphy data were then obtained and analyzed along with the respiratory questionnaire,  
160 PFT, and CPET data to examine its association with reported physical activity, symptoms, and  
161 in-laboratory measures of physical activity. The University of California San Francisco (UCSF)  
162 Institutional Review Board (IRB) and the San Francisco VA Medical Center Committee on  
163 Research and Development approved the study protocols. Full details of the methods are  
164 available in the **Supplemental Appendix**.

### 165 Study Population

166           US airline crewmembers, including flight attendants and pilots, were eligible to  
167 participate if they had worked for  $\geq 5$  years in an aircraft. A reference group of “sea-level”  
168 participants who lived in San Francisco Bay area and had never been employed as flight

169 crewmembers was also recruited. Participants were eligible if they were nonsmokers defined by  
170 never-smoking or, in ever smokers, no smoking for  $\geq 20$  years and a cumulative smoking history  
171 of  $< 20$  pack-years. Eligible participants were excluded if they had a known history of  
172 cardiopulmonary disease or recreational drug use, including marijuana consumption. All  
173 participants enrolled in the larger cohort were invited to participate in this nested study. For the  
174 nested actigraphy study, recruitment began in February 5, 2014 and continued through March 17,  
175 2020.

#### 176 Physical Activity Monitoring using Actigraphy

177 Physical activity was monitored using a triaxial accelerometer-based activity monitor  
178 (ActiGraph GT3X; Actigraph Corporations, Pensacola, FL). Technical details of the device can  
179 be found in the **Supplemental Appendix**. The ActiGraph monitor was initialized to  
180 continuously collect data over a period of 5 days. It was then mailed to participants along with a  
181 daily diary to keep a log of the time the monitor was worn and the activities the participants  
182 performed during that time. All participants received the ActiGraph monitors at least 7 days prior  
183 to the in-laboratory visit, during which respiratory symptom questionnaire, PFT, and CPET data  
184 were collected. Participants were instructed to wear the ActiGraph monitor on the waist upon  
185 awakening using a wrist band provided and to keep it on continuously for at least 8 hours for 5  
186 consecutive days beginning the start of the first day of their work week. The 5-day monitoring  
187 period was chosen to allow for adequate weekday data collection<sup>10</sup> while avoiding recording of  
188 non-routine rest or activity periods that typically occur during weekends. All participants were  
189 carefully instructed on correctly positioning the device.

#### 190 Actigraphy Data Description and Processing

191 Actigraphy data were processed using the ActiLife software program (Version 6.11.9;  
192 ActiGraph LLC) and saved in raw format as GT3X files. The ActiLife software generates a total  
193 of 52 variables in the distance, time (activity and sedentary), and energy domains. The list of  
194 variables and their definitions are shown in **Table S1**. The actigraphy data were matched against  
195 the diary to ascertain appropriate usage of the monitor, and the data were considered to be  
196 acceptable if the participants wore the monitor for a minimum of 3 days and for more than 5  
197 hours (300 min) per day. The data was summarized into 5-day average values (weekly “mean”  
198 values) and the highest values of “maximum” values (maximum per epoch) across all 5 days  
199 (weekly “highest” values). The total amount of the time that the monitor was worn was included  
200 in the regression models as *total time worn*.

#### 201 Actigraphy Data Variable Selection

202 Actigraphy generates a large number of variables, some of which are highly correlated.  
203 Given the low number of participants in our study, we decided to reduce the number of  
204 actigraphy variables to increase the robustness of the analysis. To achieve this, we pursued two  
205 approaches of variable selection: (1) machine learning approach, and (2) literature-guided  
206 approach (**Figure 1**).

207 In the machine learning approach, we built two models, random forest and lasso  
208 regression. Using random forest modeling, we generated a list of top-ranked actigraphy variables  
209 that were predictive of various questionnaire, PFT, and CPET outcomes by ranking variables  
210 based on minimizing prediction error at the splitting of the decision tree nodes. For lasso  
211 regression, we used a similar strategy to generate a list of important variables by utilizing the  $l_1$ -  
212 norm penalized terms to force unimportant variables to become zero. To rank the variables in  
213 lasso regression, we then compared the magnitude of variable coefficients in various models.

214 Finally, we summarized the actigraphy variables by including the top 10 variables from each  
215 model.

216 In the literature-guided approach, we reviewed the available literature on actigraphy and  
217 selected 9 variables to represent distance, energy, and the activity and sedentary time domains as  
218 described below (**Table S2**). The final set of variables was selected based on a combination of  
219 the machine learning and literature-guided approaches to provide meaningful variables of highest  
220 predictive value for our proposed analysis.

### 221 Pulmonary Function and Cardiopulmonary Exercise Testing

222 Details of our PFT and CPET procedures are presented in the **Supplemental Appendix**  
223 and have been previously described.<sup>9,11,12</sup>

### 224 Respiratory Questionnaires

225 Patient-reported respiratory symptoms, physical activity, and quality of life assessments  
226 were conducted using the COPD Assessment Test (CAT),<sup>13</sup> modified Medical Research Council  
227 (mMRC) Dyspnea Scale,<sup>14</sup> the Short Form 12-Item Health Survey (SF-12),<sup>15</sup> International  
228 Physical Activity Questionnaire (IPAQ),<sup>16</sup> and Airway Questionnaire 20 (AQ20).<sup>17</sup>

### 229 Data Analysis

230 Distributions of patients' actigraphy, respiratory symptom, lung function, and exercise  
231 data were visualized and inspected (**Figure S1**). Because most variables were not normally  
232 distributed, Spearman's rank correlation was used throughout the analysis. We then examined  
233 the association of actigraphy distance, energy, and activity and sedentary time domains with  
234 respiratory questionnaire, PFT, and CPET outputs after adjustment for age, sex, height, weight,

235 and time worn using hierarchical clustering with the Spearman correlation coefficient as the  
236 distance metric.

237 Even after selection of a focused set of actigraphy variables, the initial exploratory  
238 analyses showed two potential statistical challenges, namely, high dimensionality and high  
239 collinearity, for the application of these variables to ordinary linear regression modeling. To  
240 address these challenges, we employed partial principal component regression, which combined  
241 principal component analysis with adjustment for covariates to reduce the number of dimensions  
242 and transformed the original variables into orthogonal principal component (PC) axes. Next, we  
243 performed ordinary linear regression using the top six PC axes as the new predictive actigraphy  
244 variables within the model. We later computed the Pearson correlation coefficients between the  
245 original actigraphy variables versus the transformed PC axes to help interpret the representation  
246 of each PC axis. We used P-values of 0.05 as the cutoff for statistical significance and considered  
247 Spearman and Pearson correlation coefficients  $\pm 0.5$  as indicating strong correlation (either  
248 positive or negative).

249

## 250 **RESULTS**

### 251 Participant Characteristics

252 Overall, 64 volunteers participated in the nested study and wore the actigraphy monitor  
253 during the week before participating in the in-laboratory assessments with respiratory  
254 questionnaires, PFT, and CPET. Three of the 64 subjects wore the actigraphy monitor for <3  
255 consecutive days or <300 consecutive min/day and thus were excluded from the analysis. The  
256 characteristics of the 61 participants included in the analysis are shown in **Table 1**. The

257 participants were aged  $65.7 \pm 10.7$  years, predominantly female (57 [93%]), and never-smokers.  
258 All participants had a history of occupational exposure to SHS through their airline employment  
259 as flight crew for a median (interquartile range, [IQR]) period of 15.6 (6.0-25.0) years. All  
260 participants showed preserved spirometry, with forced expiratory volume in 1 s ( $FEV_1$ ) and  
261  $FEV_1$ /forced vital capacity (FVC) percent predicted values of  $103 \pm 17$  and  $98 \pm 6$ , respectively. All  
262 of them showed mild air trapping, as defined by residual volume (RV)/total lung capacity (TLC)  
263  $> 0.35$  ( $0.38 \pm 0.06$ ), and an overall reduced average diffusing capacity adjusted for hemoglobin  
264 of  $67\% \pm 28\%$  predicted. The percent predicted values for the measures of  $VO_2$ ,  $V_E$ , and oxygen-  
265 pulse at the peak of exercise ( $VO_{2Peak}$ ,  $V_{EPeak}$ , and  $O_2$ -PulsePeak) were  $103.8 \pm 18.1$ ,  $61.1 \pm 14.3$ ,  
266 and  $109.4 \pm 20.7$ , respectively, and  $VO_2$  at anaerobic threshold ( $VO_{2AT}$ ) was  $63.8\% \pm 16.7\%$  of  
267  $VO_{2Peak}$ . **Table 1** also shows the selected actigraphy data in the distance, energy, and activity and  
268 sedentary time domains. Overall, the participants wore the actigraphy monitor for a median  
269 (IQR) period of 5 (4-5) days and 38.9 (33.0-39.9) h (2,334 [1,980-2,396] min).

#### 270 Combined Approach for Selection of Appropriate Actigraphy Variables

271 In the machine learning approach, random forest and lasso regression analyses were  
272 performed to identify the most relevant actigraphy variables that are predictive of the respiratory  
273 questionnaire, PFT, and CPET outcomes. The top-ranked variables for each machine learning  
274 approach, which are shown in **Figure S2 A and B**, were a mix of actigraphy domains, including  
275 the sedentary time domain. The ten top ranked variables from each approach were then matched  
276 against a list of most highly cited actigraphy variables in the literature, and a final set of  
277 actigraphy variables, which included variables from all domains, were then generated for further  
278 analysis (**Figure 1**). The final set of variables obtained by this combined approach is shown in  
279 **Table 2**.

280 The correlations among all and the final selection of actigraphy variables are shown in  
281 **Figure S1** and **Figure 2**, respectively. Variables from the distance, energy, and activity time  
282 domains were highly and directly correlated with each other, with the strongest correlation  
283 observed between the energy and activity time domains and the weakest between these domains  
284 and the distance domain. However, sedentary time domain variables were poorly and inversely  
285 correlated with the variables from the distance, energy, and activity time domains (**Figure 2**).  
286 Within the sedentary time domain, the total amount of time spent in the sedentary condition  
287 (Sedentary Time) was closely and directly associated with the number of times participants  
288 broke their sedentary condition (No. of Sedentary Breaks;  $r=0.65$ ;  $P<0.001$ ).

289 Hierarchical Clustering Identified Two Clusters of Actigraphy Domains That Distinctly Group  
290 with Respiratory Questionnaire, PFT, and CPET Outcomes

291 Hierarchical clustering analysis categorized actigraphy domains into two distinct clusters  
292 (**Figure S3** and **Figure 3**). Measures of the distance, energy, and activity time domains,  
293 including moderate-to-vigorous physical activity (MVPA), maximum number of steps taken per  
294 epoch (Max. Step Count), and average hourly energy expenditure (Avg. Kcal/hour), clustered  
295 together and were best correlated with the rate of increase in O<sub>2</sub>-Pulse, tidal breathing, systolic  
296 blood pressure over workload (O<sub>2</sub>-Pulse<sub>Slope</sub>, SBP<sub>Slope</sub>, and V<sub>TSlope</sub>), and SF-12 and its “physical”  
297 component score, and to a lesser extent with air trapping (RV and RV/TLC), airflow obstruction  
298 (FEV<sub>1</sub>/FVC), ventilatory efficiency at peak exercise (V<sub>E</sub>/VCO<sub>2Peak</sub>), and other respiratory  
299 questionnaires (AQ-20 and CAT) scores. Conversely, measures of the sedentary domain,  
300 including Sedentary Time and No. of Sedentary Breaks, clustered together with spirometric  
301 indices (FEV<sub>1</sub>, FVC), TLC, and peak exercise measures of oxygen consumption (VO<sub>2Peak</sub>),  
302 ventilation (V<sub>EPeak</sub>), tidal volume (V<sub>TPeak</sub>), and oxygen-pulse (O<sub>2</sub>-Pulse<sub>Peak</sub>).

303 Principal Component Analysis of a Focused Dataset of Actigraphy Variables Reproduced  
304 Contrasting Actigraphy Domains Represented by Two Principal Components

305 To address the high dimensionality and collinearity of actigraphy variables, we  
306 performed principal component analysis (**Table 3**) and regression of the final set of variables  
307 (**Table 4**). The first six principal components (PC) explained 87.8% of the variation in the  
308 dataset and were chosen for further analysis. The most contributing PC (PC1) showed high  
309 positive values for the following parameters: measures of energy expenditure (Avg.  
310 Kcal/hour=0.92, Highest MET=0.94, and Mean MET=0.96), maximum number of steps taken  
311 per epoch (Max. Step Count=0.56), average number of steps taken per minute (Avg.  
312 Steps/min=0.91), maximum number of steps counts on actigraphy axes 1 and 3, and as a vector  
313 magnitude across all 3 axes (Vector Magnitude Max. Count=0.4), time spent in MVPA (Highest  
314 Total MVPA=0.92; Avg. MVPA/hour=0.94). Therefore, PC1 was determined to be a reflection  
315 of the measures of activity time, distance, and energy domains of actigraphy. The second PC  
316 (PC2) was highly correlated with participant sex (0.77), height (0.84), and weight (0.84). The  
317 third PC (PC3) was highly correlated with the total time spent in the sedentary condition  
318 (Highest Sedentary Time=0.66), and thus was determined to be representative of the sedentary  
319 time domain of actigraphy. PC4 was only highly correlated with subject's age (0.77).

320 Results of the principal component regressions of the cardiopulmonary function and  
321 questionnaires outcomes over PC1 (“activity component) and PC3 (“sedentary component”) are  
322 presented in **Table 4**. In the activity domains represented by PC1, a significant positive  
323 association was only observed with the volume of oxygen consumption at anaerobic threshold  
324 ( $VO_{2AT}$ ) ( $P=0.026$ ). In the actigraphy sedentary domain represented by PC3, significant negative  
325 associations were observed with  $FEV_1$  ( $P=0.042$ ) (marginally non-significance with FVC



326 [P=0.075] and TLC [P=0.057]) and the total and “mental” component of SF-12 score (P=0.042  
327 and P=0.035, respectively). No other significant associations were present.

328

## 329 **DISCUSSION**

330 In this observational study, actigraphy variables were grouped into two distinct clusters  
331 of (1) distance, energy, and activity time domains and (2) sedentary time domain. Remarkably,  
332 these clusters did not show a simple inverse relationship, were rather poorly correlated, and  
333 grouped together differently with various measures of in-laboratory cardiopulmonary functional  
334 assessment and self-reported symptomatology, indicating that they are influenced by distinct  
335 physiological processes. Despite their grouping patterns, the actigraphy variables were  
336 significantly associated with only a few in-laboratory measures of cardiopulmonary function or  
337 symptoms. For example, the principal component representing activity domains was only  
338 significantly associated with the anaerobic threshold ( $VO_{2AT}$ ), and the principal component  
339 representing sedentary domain was only significantly associated with lower airflow ( $FEV_1$ ) and  
340 possibly smaller lung volumes (TLC and FVC), and worse symptoms and quality of life score by  
341 one questionnaire (SF-12). Overall, actigraphy provided distinct information about functionality  
342 and daily physical activity that was not captured by in-laboratory lung function, exercise testing,  
343 or standardized respiratory questionnaires. Thus, while in-laboratory functional assessments may  
344 help evaluate functional *capacity*, actigraphy may be more informative of the real-world  
345 functional *status*, and may serve as an additional objective patient-centered technique in studies  
346 aiming to assess functionality.

347 Wearable activity monitors that measure the real-world physical activity level in  
348 individuals provide objective and reliable data for assessment of health status and disease

349 activity.<sup>4-7</sup> The advantage of using wearable technology for functional assessment stems from its  
350 niche ability to provide invaluable data pertaining to the daily functioning and overall health of  
351 patients that is otherwise inaccessible and unobtainable through traditional clinical  
352 assessments.<sup>18,19</sup> For example, in COPD, activity monitor outputs may have predictive value in  
353 the assessment of disease severity as measured by exercise capacity and healthcare  
354 utilization.<sup>20,21</sup> A multicenter trial in which several activity monitors were validated against  
355 directly measured energy expenditure showed certain accelerometers, including ActiGraph  
356 GT3X used in our study, provide great correlations with most measures of exercise capacity in  
357 COPD.<sup>22</sup> However, the utility of these activity monitors has not been sufficiently studied in those  
358 at risk for COPD but without airflow obstruction (early disease with preserved spirometry or pre-  
359 COPD). Similarly, their relationships with other laboratory or clinical outcome modalities of  
360 disease assessment such as lung function and exercise performance are not clear. Our study used  
361 the literature and machine learning approaches to examine the associations of various domains of  
362 actigraphy with in-laboratory and self-reported measures of cardiopulmonary function in people  
363 at risk for COPD but with preserved spirometry.

364         Given their practicality, low cost, and general acceptance, standardized questionnaires are  
365 frequently used for assessing self-reports of symptoms and quality of life as well as physical  
366 activity. Questionnaires can evaluate a wide range of physical activities, including stationary  
367 activities such as weight lifting, over long timeframes. However, they are subjective in nature,  
368 suffer from social desirability and recall bias,<sup>23,24</sup> and often tend to over- or under-estimate true  
369 physical activity, energy expenditure, and sedentary behavior.<sup>3,25,26</sup> Activity monitors could  
370 provide more objective assessments of physical activity. Physical activity scores measured by  
371 questionnaires and accelerometry show a weak-to-moderate correlation.<sup>27-29</sup> In our study, the

372 outcome measures of respiratory questionnaires (especially SF-12 and its physical component)  
373 were loosely clustered together with the distance, energy, and activity domains of actigraphy,  
374 while in PCA regression, SF-12 and its mental component were negatively associated with the  
375 sedentary domain of actigraphy. These features of the clustering of the sedentary and activity  
376 domains of actigraphy indicates that actigraphy activity and sedentary domains are informative  
377 of distinct outcomes, which are only partially and incompletely captured by outcome measures of  
378 respiratory questionnaires, consistent with the findings of other studies in which the sedentary  
379 domain of actigraphy could predict metabolic outcomes and risk of mortality independent of the  
380 activity domain.<sup>30,31</sup>

381 CPET is a relatively noninvasive in-laboratory physiological test that objectively  
382 measures the cardiopulmonary response to exercise and is used to diagnose early  
383 cardiopulmonary and metabolic diseases and monitor their response to treatment. However,  
384 CPET may be less feasible in clinical applications because of its cost and technical requirements.  
385 Activity monitors provide a less labor-intensive and yet real-world representative assessment of  
386 the physical activity state of patients. In healthy youth, a positive relationship between  
387 accelerometer-measured intensity of physical activity and cardiorespiratory fitness as measured  
388 by maximum volume of oxygen consumption ( $VO_{2MAX}$ ) has been established.<sup>32,33</sup> Similarly, in  
389 healthy adults, the physical activity variables of the time spent in MVPA or vigorous physical  
390 activity were shown to be related to the  $VO_{2MAX}$ .<sup>34</sup> In the present study of older adults at risk for  
391 COPD but with preserved spirometry, the actigraphy activity domains (including MVPA) did not  
392 group together with CPET outcomes at peak exercise (e.g.  $VO_{2Peak}$ ) in cluster analysis, nor were  
393 they significantly associated with these outcomes in PCA regression. Interestingly, while they  
394 were not statistically significant in PCA regression, actigraphy activity domains were closely

395 associated with the rate of increase in some of the cardiovascular responses to exercise, including  
396  $O_2\text{-Pulse}_{\text{Slope}}$  and  $SBP_{\text{Slope}}$ , suggesting a possible correlation between the activity domains of  
397 actigraphy and cardiovascular performance. Accordingly, the association of the activity domains  
398 of actigraphy with  $VO_{2AT}$  likely represents the level of subjects' fitness, with the more physically  
399 active individuals reaching their anaerobic threshold at a higher  $VO_2$ .

#### 400 **Limitations**

401 Our study had several limitations. First, this study had a relatively small sample of 61  
402 participants, which may have diminished the learning power of our machine learning approach  
403 for variable selection as well as the statistical power of the final regression modeling. This study  
404 was nested in a larger cohort study of the cardiopulmonary health effects of prolonged  
405 occupational exposure to SHS, the inclusion and exclusion criteria of which were more stringent  
406 and limited our ability to expand our sample size. Nevertheless, our sample size was comparable  
407 if not larger relative to other published studies that have characterized physical activity using  
408 extensive examination including CPET,<sup>35-37</sup> and thus provides similar statistical power.

409 Second, actigraphy data were only collected for five days. In adults, a minimum of 3 to 5  
410 days of accelerometer monitoring is usually considered appropriate to obtain reliable estimates of  
411 physical activity.<sup>10</sup> On the other hand, a longer measurement period of more than 7 days may be  
412 desirable to obtain reliable estimates of sedentary behavior since sedentary behavior is more  
413 difficult to capture as it might vary more on a day-by-day basis than other activities performed  
414 on a higher intensity-level.<sup>38</sup> However, we aimed to avoid the potential biases that usually occur  
415 with variations in level of activity, either increased or decreased, during the weekends by asking  
416 the participants to wear the activity monitor for 5 weekdays at the beginning of their working  
417 week and the beginning of their day to capture their usual and customary level of activity. In

418 fact, our findings demonstrate a greater number of significant associations for the sedentary  
419 domain, suggesting the adequacy of the timeframe within the population studied.

420 Third, a single activity monitor placed on the waist may not have detected all physical  
421 activity since accelerometers have a key limitation in that they are insensitive to certain types of  
422 movements, especially non-ambulatory physical activities with arms and/or limbs. However,  
423 studies employing multiple accelerometers to increase the accuracy of predicting energy  
424 expenditure reported only marginal improvements that would not be justifiable by the increased  
425 burden associated with wearing multiple accelerometers.<sup>39,40</sup>

## 426 **Conclusion**

427 In conclusion, in this study of a population with early obstructive lung disease or pre-  
428 COPD showed that (1) outpatient actigraphy provides “real-world” patient-centered outcomes  
429 that objectively inform of patients’ physical activity status, and (2) the activity and sedentary  
430 domains of actigraphy are divergent and provide distinct information likely representing the  
431 different physiologic processes highlighted by those domains. Furthermore, actigraphy measures  
432 are not entirely explained by measures of standardized respiratory questionnaires, lung function,  
433 or exercise testing, and thus provide added physical activity measures that are valuable as  
434 objective patient-centered outcomes in observational and interventional research studies.

435 **REFERENCES**

436 **References**

437

- 438 1. Kocks JW, Asijee GM, Tsiligianni IG, Kerstjens HA, van der Molen T. Functional status  
439 measurement in COPD: a review of available methods and their feasibility in primary  
440 care. *Prim Care Respir J*. 2011;20(3):269-275.
- 441 2. Kim J, Lee CH, Lee MG, et al. Acute Exacerbation According to GOLD 2017 Categories  
442 in Patients with Chronic Obstructive Pulmonary Disease. *Arch Bronconeumol*.  
443 2019;55(8):414-420.
- 444 3. Prince SA, Adamo KB, Hamel ME, Hardt J, Connor Gorber S, Tremblay M. A  
445 comparison of direct versus self-report measures for assessing physical activity in adults:  
446 a systematic review. *Int J Behav Nutr Phys Act*. 2008;5:56.
- 447 4. Pevnick JM, Birkeland K, Zimmer R, Elad Y, Kedan I. Wearable technology for  
448 cardiology: An update and framework for the future. *Trends Cardiovasc Med*.  
449 2018;28(2):144-150.
- 450 5. Chiauzzi E, Rodarte C, DasMahapatra P. Patient-centered activity monitoring in the self-  
451 management of chronic health conditions. *BMC Med*. 2015;13:77.
- 452 6. Ferriolli E, Skipworth RJ, Hendry P, et al. Physical activity monitoring: a responsive and  
453 meaningful patient-centered outcome for surgery, chemotherapy, or radiotherapy? *J Pain*  
454 *Symptom Manage*. 2012;43(6):1025-1035.
- 455 7. Gresham G, Schrack J, Gresham LM, et al. Wearable activity monitors in oncology trials:  
456 Current use of an emerging technology. *Contemp Clin Trials*. 2018;64:13-21.

- 457 8. Bunn JA, Navalta JW, Fountaine CJ, Reece JD. Current State of Commercial Wearable  
458 Technology in Physical Activity Monitoring 2015-2017. *Int J Exerc Sci.* 2018;11(7):503-  
459 515.
- 460 9. Arjomandi M, Zeng S, Geerts J, et al. Lung volumes identify an at-risk group in persons  
461 with prolonged secondhand tobacco smoke exposure but without overt airflow  
462 obstruction. *BMJ Open Respir Res.* 2018;5(1):e000284.
- 463 10. Trost SG, McIver KL, Pate RR. Conducting accelerometer-based activity assessments in  
464 field-based research. *Med Sci Sports Exerc.* 2005;37(11 Suppl):S531-543.
- 465 11. Arjomandi M, Haight T, Redberg R, Gold WM. Pulmonary function abnormalities in  
466 never-smoking flight attendants exposed to secondhand tobacco smoke in the aircraft  
467 cabin. *J Occup Environ Med.* 2009;51(6):639-646.
- 468 12. Arjomandi M, Haight T, Sadeghi N, Redberg R, Gold WM. Reduced exercise tolerance  
469 and pulmonary capillary recruitment with remote secondhand smoke exposure. *PLoS*  
470 *One.* 2012;7(4):e34393.
- 471 13. Jones PW, Harding G, Berry P, Wiklund I, Chen WH, Kline Leidy N. Development and  
472 first validation of the COPD Assessment Test. *Eur Respir J.* 2009;34(3):648-654.
- 473 14. Fletcher CM, Elmes PC, Fairbairn AS, Wood CH. The significance of respiratory  
474 symptoms and the diagnosis of chronic bronchitis in a working population. *Br Med J.*  
475 1959;2(5147):257-266.
- 476 15. Jenkinson C, Layte R. Development and testing of the UK SF-12 (short form health  
477 survey). *J Health Serv Res Policy.* 1997;2(1):14-18.
- 478 16. Craig CL, Marshall AL, Sjöström M, et al. International physical activity questionnaire:  
479 12-country reliability and validity. *Med Sci Sports Exerc.* 2003;35(8):1381-1395.

- 480 17. Hajiro T, Nishimura K, Jones PW, et al. A novel, short, and simple questionnaire to  
481 measure health-related quality of life in patients with chronic obstructive pulmonary  
482 disease. *Am J Respir Crit Care Med*. 1999;159(6):1874-1878.
- 483 18. Rowe VT, Neville M. Measuring Reliability of Movement With Accelerometry: Fitbit(®)  
484 Versus ActiGraph(®). *Am J Occup Ther*. 2019;73(2):7302205150p7302205151-  
485 7302205150p7302205156.
- 486 19. Yang CC, Hsu YL. A review of accelerometry-based wearable motion detectors for  
487 physical activity monitoring. *Sensors (Basel)*. 2010;10(8):7772-7788.
- 488 20. Rahman MJ, Nemati E, Rahman M, Vatanparvar K, Nathan V, Kuang J. Toward Early  
489 Severity Assessment of Obstructive Lung Disease Using Multi-Modal Wearable Sensor  
490 Data Fusion During Walking. *Annu Int Conf IEEE Eng Med Biol Soc*. 2020;2020:5935-  
491 5938.
- 492 21. Lin WY, Verma VK, Lee MY, Lin HC, Lai CS. Prediction of 30-Day Readmission for  
493 COPD Patients Using Accelerometer-Based Activity Monitoring. *Sensors (Basel)*.  
494 2019;20(1).
- 495 22. Rabinovich RA, Louvaris Z, Raste Y, et al. Validity of physical activity monitors during  
496 daily life in patients with COPD. *Eur Respir J*. 2013;42(5):1205-1215.
- 497 23. Sallis JF, Saelens BE. Assessment of physical activity by self-report: status, limitations,  
498 and future directions. *Res Q Exerc Sport*. 2000;71(2 Suppl):S1-14.
- 499 24. Adams SA, Matthews CE, Ebbeling CB, et al. The effect of social desirability and social  
500 approval on self-reports of physical activity. *Am J Epidemiol*. 2005;161(4):389-398.



- 501 25. Adamo KB, Prince SA, Tricco AC, Connor-Gorber S, Tremblay M. A comparison of  
502 indirect versus direct measures for assessing physical activity in the pediatric population:  
503 a systematic review. *Int J Pediatr Obes.* 2009;4(1):2-27.
- 504 26. Kowalski K, Rhodes R, Naylor PJ, Tuokko H, MacDonald S. Direct and indirect  
505 measurement of physical activity in older adults: a systematic review of the literature. *Int*  
506 *J Behav Nutr Phys Act.* 2012;9:148.
- 507 27. Helmerhorst HJ, Brage S, Warren J, Besson H, Ekelund U. A systematic review of  
508 reliability and objective criterion-related validity of physical activity questionnaires. *Int J*  
509 *Behav Nutr Phys Act.* 2012;9:103.
- 510 28. Skender S, Ose J, Chang-Claude J, et al. Accelerometry and physical activity  
511 questionnaires - a systematic review. *BMC Public Health.* 2016;16:515.
- 512 29. van Poppel MN, Chinapaw MJ, Mokkink LB, van Mechelen W, Terwee CB. Physical  
513 activity questionnaires for adults: a systematic review of measurement properties. *Sports*  
514 *Med.* 2010;40(7):565-600.
- 515 30. Koster A, Caserotti P, Patel KV, et al. Association of sedentary time with mortality  
516 independent of moderate to vigorous physical activity. *PLoS One.* 2012;7(6):e37696.
- 517 31. Healy GN, Dunstan DW, Salmon J, Shaw JE, Zimmet PZ, Owen N. Television time and  
518 continuous metabolic risk in physically active adults. *Med Sci Sports Exerc.*  
519 2008;40(4):639-645.
- 520 32. Dencker M, Thorsson O, Karlsson MK, et al. Daily physical activity and its relation to  
521 aerobic fitness in children aged 8-11 years. *Eur J Appl Physiol.* 2006;96(5):587-592.
- 522 33. Gutin B, Yin Z, Humphries MC, Barbeau P. Relations of moderate and vigorous physical  
523 activity to fitness and fatness in adolescents. *Am J Clin Nutr.* 2005;81(4):746-750.

- 524 34. Cao ZB, Miyatake N, Higuchi M, Miyachi M, Ishikawa-Takata K, Tabata I. Predicting  
525 VO<sub>2</sub>max with an objectively measured physical activity in Japanese women. *Med Sci*  
526 *Sports Exerc.* 2010;42(1):179-186.
- 527 35. Van Remoortel H, Raste Y, Louvaris Z, et al. Validity of six activity monitors in chronic  
528 obstructive pulmonary disease: a comparison with indirect calorimetry. *PLoS One.*  
529 2012;7(6):e39198.
- 530 36. Van Remoortel H, Giavedoni S, Raste Y, et al. Validity of activity monitors in health and  
531 chronic disease: a systematic review. *International Journal of Behavioral Nutrition and*  
532 *Physical Activity.* 2012;9(1):84.
- 533 37. Demeyer H, Burtin C, Hornikx M, et al. The Minimal Important Difference in Physical  
534 Activity in Patients with COPD. *PLoS One.* 2016;11(4):e0154587.
- 535 38. Aadland E, Ylvisåker E. Reliability of Objectively Measured Sedentary Time and  
536 Physical Activity in Adults. *PLoS One.* 2015;10(7):e0133296.
- 537 39. Swartz AM, Strath SJ, Bassett DR, Jr., O'Brien WL, King GA, Ainsworth BE. Estimation  
538 of energy expenditure using CSA accelerometers at hip and wrist sites. *Med Sci Sports*  
539 *Exerc.* 2000;32(9 Suppl):S450-456.
- 540 40. Melanson EL, Jr., Freedson PS. Validity of the Computer Science and Applications, Inc.  
541 (CSA) activity monitor. *Med Sci Sports Exerc.* 1995;27(6):934-940.  
542

543 **FIGURE LEGENDS**

544

545 **Figure 1- Actigraphy variable selection.** A schematic to show the process of variable selection  
546 by combining machine learning and literature guided approaches. Machine learning approach  
547 was done by implementing random forest and lasso regression. The top ranked 10 variables from  
548 each method were done used against a list of variables extracted from the available literature, and  
549 a final “focused” set of variables representing all actigraphy domains were selected. “Highest”  
550 and “Mean” for actigraphy variables represent the highest and mean of 5-day activity monitoring  
551 measurements.

552

553 **Figure 2- Correlation among final set of actigraphy variables.** Spearman correlation  
554 coefficient in clustering heat map of the final selection of actigraphy variables. Visualization  
555 shows that almost all of actigraphy variables are highly correlated.

556

557 **Figure 3 – Hierarchical clustering analysis and heatmap representation of final selection of**  
558 **actigraphy variables with questionnaire, PFT, and CPET measures.** We performed cluster  
559 analysis using Spearman correlation coefficients as the distance metric. The clustered  
560 relationships were present as the dendrograms on the top and left size of the heat map. Two  
561 distinct clusters of actigraphy variables were grouped together from the three domains (time,  
562 distance, energy). The two clusters were based on activity related (such as total energy spent in  
563 Kcals, number of steps walked, etc.) and sedentary related (such as sedentary time, break, etc.)  
564 respectively. Each row represents one subject. Grey box are missing values.

565



567 **TABLES**

568 **Table 1- Subject characteristics.**

| <b>Characteristics</b>               | <b>N=61</b>     |
|--------------------------------------|-----------------|
| <b>Demographics</b>                  |                 |
| Age (years)                          | 65.7±7.5        |
| Female sex [n(%)]                    | 57(93%)         |
| Height (cm)                          | 165.5±7.5       |
| Weight (kg)                          | 65.5±10.7       |
| BMI (kg/m <sup>2</sup> )             | 23.9±3.2        |
| SHS (years)                          | 16.0 [6.0-25.0] |
| Smoking (pack-year)                  | 0 [0-0]         |
| <b>Lung Function</b>                 |                 |
| FEV <sub>1</sub> (L)                 | 2.50±0.52       |
| FEV <sub>1</sub> (% predicted)       | 103±17          |
| FVC (L)                              | 3.33±0.69       |
| FVC (% predicted)                    | 106±16          |
| FEV <sub>1</sub> /FVC [%]            | 75±5            |
| FEV <sub>1</sub> /FVC (% predicted)  | 98±6            |
| TLC (L)                              | 5.31±0.88       |
| TLC (% predicted)                    | 100±11          |
| RV (L)                               | 1.97±0.37       |
| RV (% predicted)                     | 91±15           |
| RV/TLC [%]                           | 38±6            |
| RV/TLC (% predicted)                 | 92±13           |
| DcoSB adjusted for Hgb (% predicted) | 67±28           |
| <b>Exercise</b>                      |                 |
| VO <sub>2Peak</sub> (L/min)          | 1.399±0.348     |
| VO <sub>2Peak</sub> (% predicted)    | 104±18          |
| Watts <sub>Peak</sub> (watts)        | 120.9±34.2      |

|                                                                     |             |
|---------------------------------------------------------------------|-------------|
| VCO <sub>2Peak</sub> (L/min)                                        | 1.7±0.4     |
| O <sub>2</sub> -Pulse <sub>Peak</sub> (L/beat)                      | 9.6±2.6     |
| V <sub>EPeak</sub> (L/min)                                          | 56.30±13.86 |
| V <sub>EPeak</sub> (% predicted)                                    | 61±14       |
| RER                                                                 | 33.7±8.5    |
| RR <sub>Peak</sub> (breaths/min)                                    | 33.7±8.5    |
| V <sub>TPeak</sub> (L)                                              | 1.70±0.42   |
| V <sub>TPeak</sub> (% predicted)                                    | 96±17       |
| V <sub>E</sub> /VO <sub>2Peak</sub>                                 | 38.4±6.1    |
| V <sub>E</sub> /VCO <sub>2Peak</sub>                                | 32.4±4.3    |
| HR <sub>Peak</sub> (beats/min)                                      | 146±18      |
| Systolic BP <sub>Peak</sub> (mmHg)                                  | 189±19      |
| Diastolic BP <sub>Peak</sub> (mmHg)                                 | 85±10       |
| VO <sub>2</sub> at Anaerobic Threshold (VO <sub>2AT</sub> ) (L/min) | 1.16±0.33   |
| V <sub>E</sub> /VCO <sub>2</sub> at Anaerobic Threshold             | 31.8±4.1    |
| O <sub>2</sub> -Pulse at Anaerobic Threshold (L/beat)               | 9.9±2.8     |
| <b>Questionnaires</b>                                               |             |
| AQ20                                                                | 1±2         |
| CAT                                                                 | 6.6±5.8     |
| SF-12 [Total]                                                       | 29.5±6.1    |
| SF-12 (PCS)                                                         | 37.1±5.2    |
| SF-12 (MCS)                                                         | 55.8±8.8    |
| IPAQ Category 3: High [n (%)]                                       | 44 (72%)    |
| <b>Actigraphy Domains</b>                                           |             |
| <b>Time</b>                                                         |             |
| <b>Activity Domain</b>                                              |             |
| Highest Total MVPA (min)                                            | 50.4±37.79  |
| Mean Avg. MVPA/hour (min/hr)                                        | 3.87±2.64   |
| <b>Sedentary Domain</b>                                             |             |

|                                         |             |
|-----------------------------------------|-------------|
| Highest Sedentary Time (min)            | 363.6±38.6  |
| Highest No. of Sedentary Breaks         | 7.6±3.4     |
| No. of Sedentary Breaks/Sedentary Time  | 0.02±0.01   |
| No. of Sedentary Breaks/Avg. Step Count | 0.66±0.50   |
| <b>Distance</b>                         |             |
| Highest Max. Step Count                 | 24.1±3.5    |
| Mean Avg. Step Count (steps/min)        | 15.5±8.5    |
| Highest Vector Magnitude Max. Count     | 2,081±524   |
| <b>Energy</b>                           |             |
| Highest Total Kcals (Kcals)             | 354.4±213.8 |
| Mean Total Kcals (Kcals)                | 242.4±126.1 |
| Mean Avg. Kcal/hour (Kcals/hour)        | 10.2±5.3    |
| Highest MET (METs)                      | 1.39±0.32   |
| Mean MET (METs)                         | 1.24±0.17   |

569

570 Footnote: Demographics, lung function, exercise, questionnaire scores, and actigraphy indices in

571 this cohort of subjects with preserved spirometry. Data is presented as mean±standard deviation

572 or number of subjects with positive value for the variable (n) out of the total number of subjects

573 (N) and percentage of subjects (%). “Highest” and “Mean” for actigraphy variables represent the

574 highest and mean of 5-day activity monitoring measurements. Abbreviations- BMI: body mass

575 index; FEV<sub>1</sub>: forced expiratory volume in 1 second; FVC: forced vital capacity; TLC: total lung

576 capacity; RV: residual volume; DcoSB: single-breath diffusing capacity of carbon monoxide;

577 Hgb: hemoglobin; VO<sub>2Peak</sub>: maximum oxygen uptake; Watts<sub>Max</sub>: maximum work stage

578 completed in watts; VCO<sub>2Peak</sub>: maximum carbon dioxide production; O<sub>2</sub>pulse<sub>Peak</sub>: oxygen uptake

579 per heartbeat at maximum exercise; V<sub>EPeak</sub>: maximum minute ventilation value; RER: respiratory

580 exchange ratio (VCO<sub>2</sub>/ VO<sub>2</sub>) at maximum exercise; RR<sub>Peak</sub>: maximum respiratory rate; V<sub>TPeak</sub>:

581 maximum tidal volume; AQ20: Airways Questionnaire 20; CAT: COPD Assessment Test; SF-  
582 12: 12-Item Short Form Health Survey; PCS-12: physical component summary score of SF-12;  
583 MCS-12: mental component summary score of SF-12; IPAQ: International Physical Activity  
584 Questionnaire; METs: metabolic equivalents; MVPA: moderate to vigorous physical activity;  
585 CPM: counts per minute.  
586



587 **Table 2- Definitions of final selection of actigraphy variables**

| <b>Selected Variables</b> | <b>Definition and Accelerometer Cut Point</b>                                                                                           |
|---------------------------|-----------------------------------------------------------------------------------------------------------------------------------------|
| <b>Time Domains</b>       |                                                                                                                                         |
| <b>Activity</b>           |                                                                                                                                         |
| Total MVPA                | PA that involves EE above 3.0 METs; time (in min) when CPM $\geq$ 1952                                                                  |
| Avg. MVPA/hour            | Average time spent in MVPA; total MVPA (in min)/total time worn (in hours)                                                              |
| <b>Sedentary</b>          |                                                                                                                                         |
| Sedentary Time            | Time spent in PA that does not increase EE substantially above the resting level (1.0 - 1.5 METs); time (in min) when CPM < 100         |
| No. of Sedentary Break    | Activity count change from <100 to $\geq$ 100 counts. A break only occurs if the change in count is sustained for more than 2 min       |
| <b>Distance Domain</b>    |                                                                                                                                         |
| Max. Step Count           | Maximum of the daily maximum number of steps taken per epoch (10 sec)                                                                   |
| Avg. Step Count           | Average number of steps taken per min; total step count/total time worn (in min)                                                        |
| Vector Magnitude CPM      | Vector summation of CPM across all 3 axes (vertical, horizontal and perpendicular)                                                      |
| <b>Energy Domain</b>      |                                                                                                                                         |
| Avg. Kcal/hour            | Measure of EE; a kcal is the amount of energy required to raise the temperature of a liter of water one degree centigrade at sea level; |

total kcal/total time worn (in hours)

MET

Measure of EE; MET is the ratio of a person's working metabolic rate compared to their resting metabolic rate; A person sitting quietly would be considered 1 MET (1 MET is equivalent to a caloric consumption of 1kcal/kg/hour); sedentary behavior 1.0-1.5 METs, light- intensity PA 1.6-2.9 METs, moderate-intensity PA  $\geq 3.0$  to  $<6.0$  METs, vigorous-intensity  $\geq 6.0$  to  $<9.0$  METs and very vigorous PA is  $\geq 9.0$  METs

---

588

589 Footnote: Definitions and literature citations for actigraphy variables selected using the  
590 literature-guided approach. Abbreviations- MVPA: moderate to vigorous physical activity; MET:  
591 metabolic equivalent; CPM: counts per minute; PA: physical activity; EE: energy expenditure.

592

593

594 **Table 3- Results of the principal component analysis.**

595

| Variable                             | Principal Component |             |             |             |       |       |
|--------------------------------------|---------------------|-------------|-------------|-------------|-------|-------|
|                                      | 1                   | 2           | 3           | 4           | 5     | 6     |
| Highest Total MVPA                   | <b>0.92</b>         | -0.07       | 0.01        | -0.08       | 0.06  | -0.07 |
| Mean Avg. MVPA/hour                  | <b>0.94</b>         | -0.07       | -0.02       | -0.05       | 0.02  | 0     |
| Highest Sedentary Time               | <b>-0.54</b>        | 0.22        | <b>0.66</b> | -0.26       | 0.14  | -0.09 |
| Highest No. of Sedentary Breaks      | -0.38               | 0.34        | <b>0.67</b> | -0.20       | 0.20  | 0.15  |
| Highest Max. Step Counts             | <b>0.56</b>         | -0.33       | 0.38        | -0.08       | -0.39 | -0.10 |
| Mean Avg. Step Count                 | <b>0.91</b>         | -0.15       | -0.10       | 0.01        | 0.05  | -0.09 |
| Highest Vector Magnitude Max. Counts | 0.40                | -0.09       | 0.26        | 0.15        | -0.7  | 0.45  |
| Highest Total Kcals                  | <b>0.91</b>         | 0.25        | 0.09        | -0.11       | 0.13  | 0.02  |
| Mean Total Kcals                     | <b>0.92</b>         | 0.27        | -0.02       | -0.04       | 0.10  | 0.08  |
| Mean Avg. Kcal/hour                  | <b>0.92</b>         | 0.29        | -0.01       | -0.03       | 0.10  | 0.08  |
| Highest MET                          | <b>0.94</b>         | 0.11        | 0.10        | -0.15       | 0.11  | -0.03 |
| Mean MET                             | <b>0.96</b>         | 0.15        | 0.03        | -0.11       | 0.09  | 0.05  |
| Age (years)                          | 0.15                | -0.19       | 0.23        | <b>0.77</b> | 0.43  | 0.18  |
| Sex                                  | 0.02                | <b>0.77</b> | -0.11       | 0.30        | -0.25 | 0.22  |
| Height (cm)                          | -0.16               | <b>0.84</b> | -0.10       | -0.01       | -0.17 | -0.25 |
| Weight (kg)                          | -0.04               | 0.4         | 0.03        | 0.21        | 0.01  | 0.28  |
| Total Time Worn (min)                | 0.41                | -0.17       | 0.45        | 0.40        | -0.13 | -0.49 |

596

597 Footnote: This table shows the value of Pearson's correlation coefficient for each variable in our  
598 focused dataset. Bold type indicates values  $<0.5$ . Abbreviations- MET: metabolic equivalents;  
599 MVPA: moderate to vigorous physical activity; CPM: counts per minute.  
600

**Table 4- Results of principal component regression analysis.**

| Outcomes                                      | PC1 (activity component) |          |          |         | PC3 (sedentary component) |               |               |              | Model Error |
|-----------------------------------------------|--------------------------|----------|----------|---------|---------------------------|---------------|---------------|--------------|-------------|
|                                               | Estimate                 | Lower CI | Upper CI | P-value | Estimate                  | Lower CI      | Upper CI      | P-value      | RMSE        |
| <b>Lung function</b>                          |                          |          |          |         |                           |               |               |              |             |
| FEV <sub>1</sub> (L)                          | 0.005                    | -0.032   | 0.042    | 0.808   | <b>-0.094</b>             | <b>-0.183</b> | <b>-0.006</b> | <b>0.042</b> | 0.39        |
| FVC (L)                                       | -0.002                   | -0.050   | 0.046    | 0.924   | -0.107                    | -0.222        | 0.009         | 0.075        | 0.51        |
| FEV <sub>1</sub> /FVC [%]                     | 0.002                    | -0.002   | 0.007    | 0.284   | -0.004                    | -0.014        | 0.006         | 0.458        | 0.05        |
| RV (L)                                        | -0.005                   | -0.037   | 0.028    | 0.781   | -0.045                    | -0.131        | 0.04          | 0.305        | 0.32        |
| TLC (L)                                       | -0.016                   | -0.077   | 0.044    | 0.597   | -0.143                    | -0.288        | 0.001         | 0.057        | 0.32        |
| RV/TLC [%]                                    | -0.001                   | -0.006   | 0.004    | 0.796   | 0.003                     | -0.010        | 0.017         | 0.617        | 0.05        |
| <b>Exercise</b>                               |                          |          |          |         |                           |               |               |              |             |
| VO <sub>2Peak</sub> (L/min)                   | 0.002                    | -0.020   | 0.025    | 0.838   | 0.016                     | -0.039        | 0.070         | 0.575        | 0.23        |
| O <sub>2</sub> pulse <sub>Peak</sub> (L/beat) | 0.179                    | -0.021   | 0.379    | 0.088   | 0.131                     | -0.327        | 0.590         | 0.578        | 1.52        |
| V <sub>EPeak</sub> (L/min)                    | 0.133                    | -1.217   | 1.482    | 0.848   | 0.231                     | -3.144        | 3.607         | 0.894        | 11.25       |
| RR <sub>Peak</sub> (breaths/min)              | -0.611                   | -1.390   | 0.167    | 0.130   | 1.741                     | -0.171        | 3.654         | 0.081        | 7.92        |
| V <sub>TPeak</sub> (L)                        | 0.006                    | -0.022   | 0.035    | 0.660   | -0.062                    | -0.131        | 0.008         | 0.087        | 0.29        |
| V <sub>E</sub> /VCO <sub>2Peak</sub>          | -0.147                   | -0.625   | 0.331    | 0.551   | 0.314                     | -0.882        | 1.509         | 0.610        | 3.99        |
| Watts <sub>Peak</sub> (watts)                 | 1.067                    | -0.939   | 3.072    | 0.302   | -0.104                    | -5.029        | 4.821         | 0.967        | 20.40       |
| Systolic BP <sub>Peak</sub> (mmHg)            | 0.112                    | -1.639   | 1.863    | 0.901   | -0.376                    | -4.696        | 3.945         | 0.865        | 17.51       |
| Diastolic BP <sub>Peak</sub> (mmHg)           | 0.515                    | -0.488   | 1.518    | 0.320   | 0.042                     | -2.434        | 2.518         | 0.974        | 10.04       |

|                                                 |              |              |              |              |               |               |               |              |        |
|-------------------------------------------------|--------------|--------------|--------------|--------------|---------------|---------------|---------------|--------------|--------|
| VO <sub>2</sub> at Anaerobic Threshold (L/min)  | <b>0.032</b> | <b>0.005</b> | <b>0.059</b> | <b>0.026</b> | 0.005         | -0.065        | 0.076         | 0.885        | 0.25   |
| VCO <sub>2Slope</sub> (L/min)                   | -0.005       | -0.017       | 0.007        | 0.405        | -0.002        | -0.031        | 0.028         | 0.917        | 0.12   |
| O <sub>2</sub> -Pulse <sub>Slope</sub> (L/beat) | 0.071        | -0.016       | 0.158        | 0.118        | 0.127         | -0.090        | 0.344         | 0.259        | 0.73   |
| V <sub>ESlope</sub> (L/min)                     | -0.516       | -1.163       | 0.132        | 0.127        | 0.185         | -1.435        | 1.805         | 0.824        | 5.40   |
| RR <sub>Slope</sub> (breaths/min)               | -0.183       | -0.714       | 0.349        | 0.503        | 0.128         | -1.177        | 1.1434        | 0.848        | 5.41   |
| V <sub>TSlope</sub> (L)                         | -0.016       | -0.046       | 0.015        | 0.315        | -0.025        | -0.099        | 0.049         | 0.507        | 0.31   |
| Systolic BP <sub>Slope</sub> (mmHg)             | 8.095        | -9.451       | 25.641       | 0.370        | 18.368        | -24.726       | 61.462        | 0.408        | 178.45 |
| Diastolic BP <sub>Slope</sub> (mmHg)            | 0.205        | -0.768       | 1.177        | 0.682        | -0.936        | -3.325        | 1.453         | 0.446        | 9.89   |
| <b>Questionnaires</b>                           |              |              |              |              |               |               |               |              |        |
| AQ20                                            | -0.150       | -0.336       | 0.036        | 0.120        | 0.261         | -0.193        | 0.715         | 0.266        | 1.86   |
| CAT                                             | -0.332       | -0.980       | 0.316        | 0.322        | -0.101        | -1.697        | 1.496         | 0.902        | 5.31   |
| SF-12 [Total]                                   | -0.319       | -0.880       | 0.241        | 0.270        | <b>-1.471</b> | <b>-2.840</b> | <b>-0.103</b> | <b>0.041</b> | 5.60   |
| SF-12 (PCS)                                     | -0.026       | -0.513       | 0.462        | 0.918        | -0.451        | -1.641        | 0.738         | 0.461        | 4.87   |
| SF-12 (MCS)                                     | -0.791       | -1.568       | -0.014       | 0.052        | <b>-2.102</b> | <b>-3.999</b> | <b>-0.204</b> | <b>0.035</b> | 7.76   |

## FIGURES

**Figure 1- Actigraphy variable selection.** A schematic to show the process of variable selection by combining machine learning and literature guided approaches. Machine learning approach was done by implementing random forest and lasso regression. The top ranked 10 variables from each method were done used against a list of variables extracted from the available literature, and a final “focused” set of variables representing all actigraphy domains were selected. “Highest” and “Mean” for actigraphy variables represent the highest and mean of 5-day activity monitoring measurements.

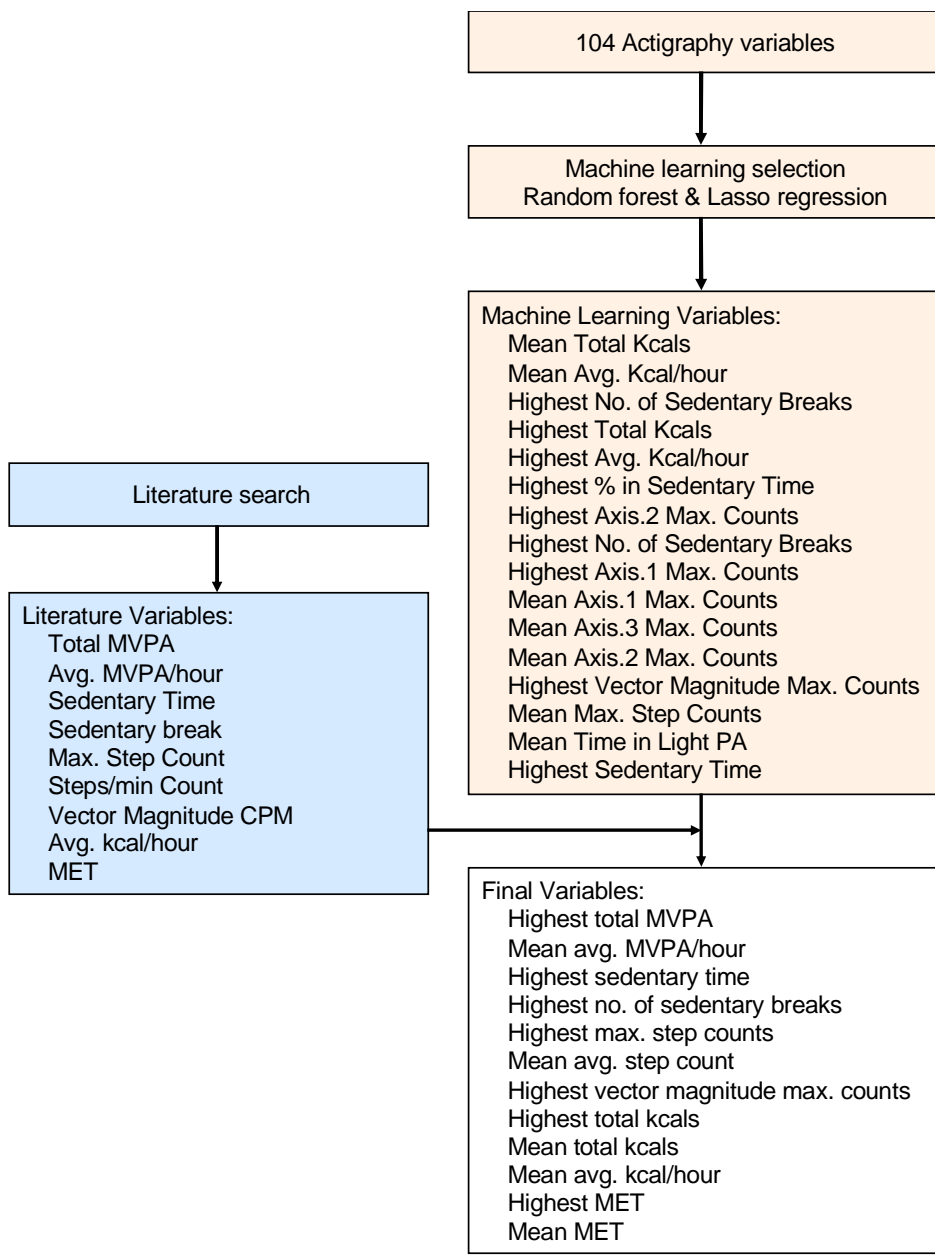



**Figure 2- Correlation among final set of actigraphy variables.** Spearman correlation coefficient in clustering heat map of the final selection of actigraphy variables. Visualization shows that almost all of actigraphy variables are highly correlated.

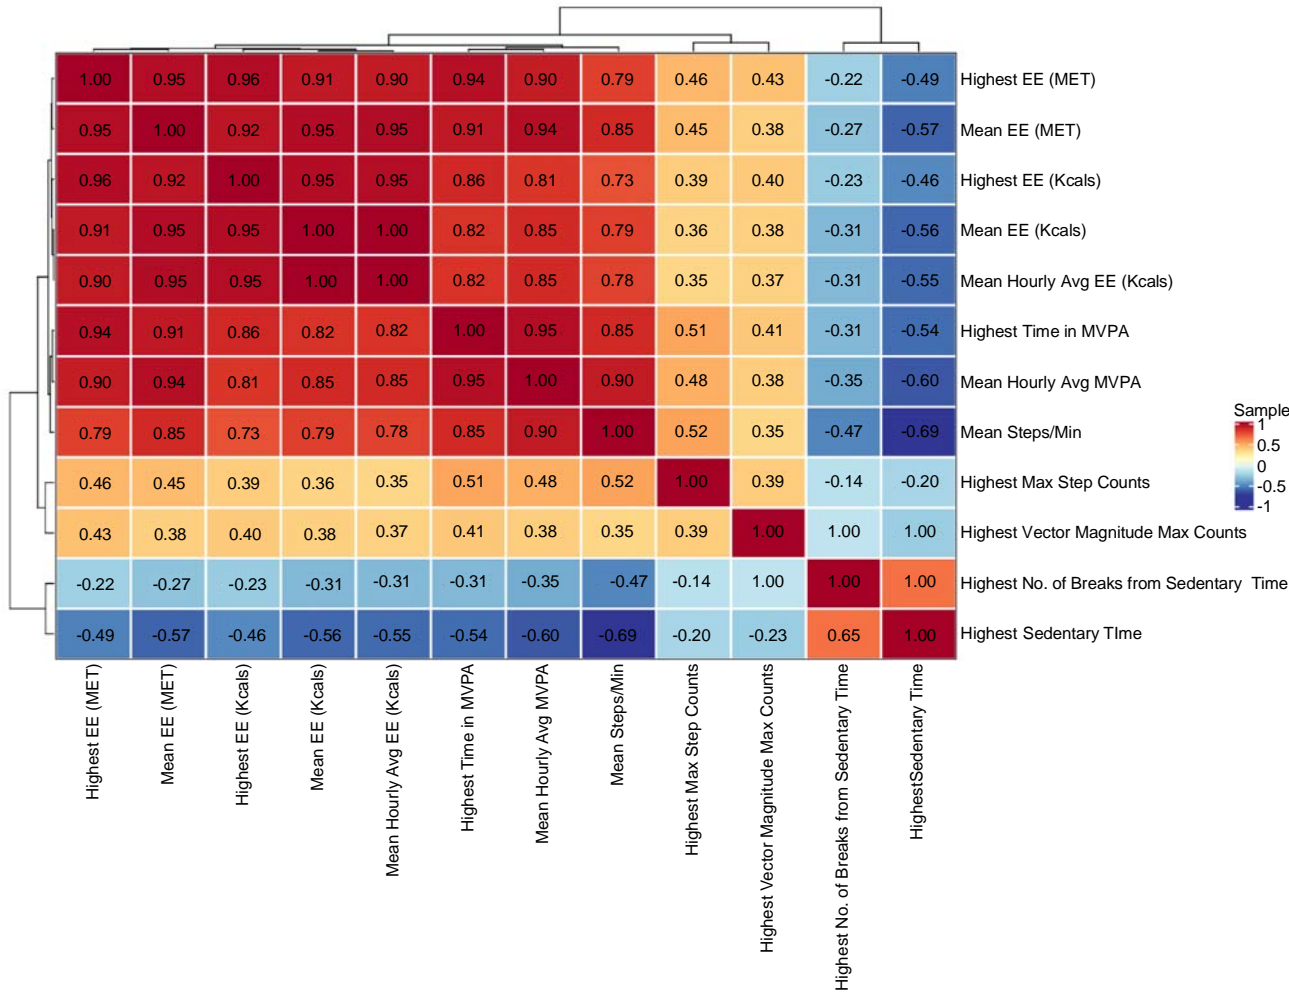

**Figure 3- Hierarchical clustering analysis and heatmap representation of final selection of actigraphy variables with questionnaire, PFT, and CPET measures.** We performed cluster analysis using Spearman correlation coefficients as the distance metric. The clustered relationships were present as the dendrograms on the top and left side of the heat map. Two distinct clusters of actigraphy variables were grouped together from the three domains (time, distance, energy). The two clusters were based on activity related (such as total energy spent in Kcals, number of steps walked, etc.) and sedentary related (such as sedentary time, break, etc.) respectively. Each row represents one subject. Grey box are missing values.

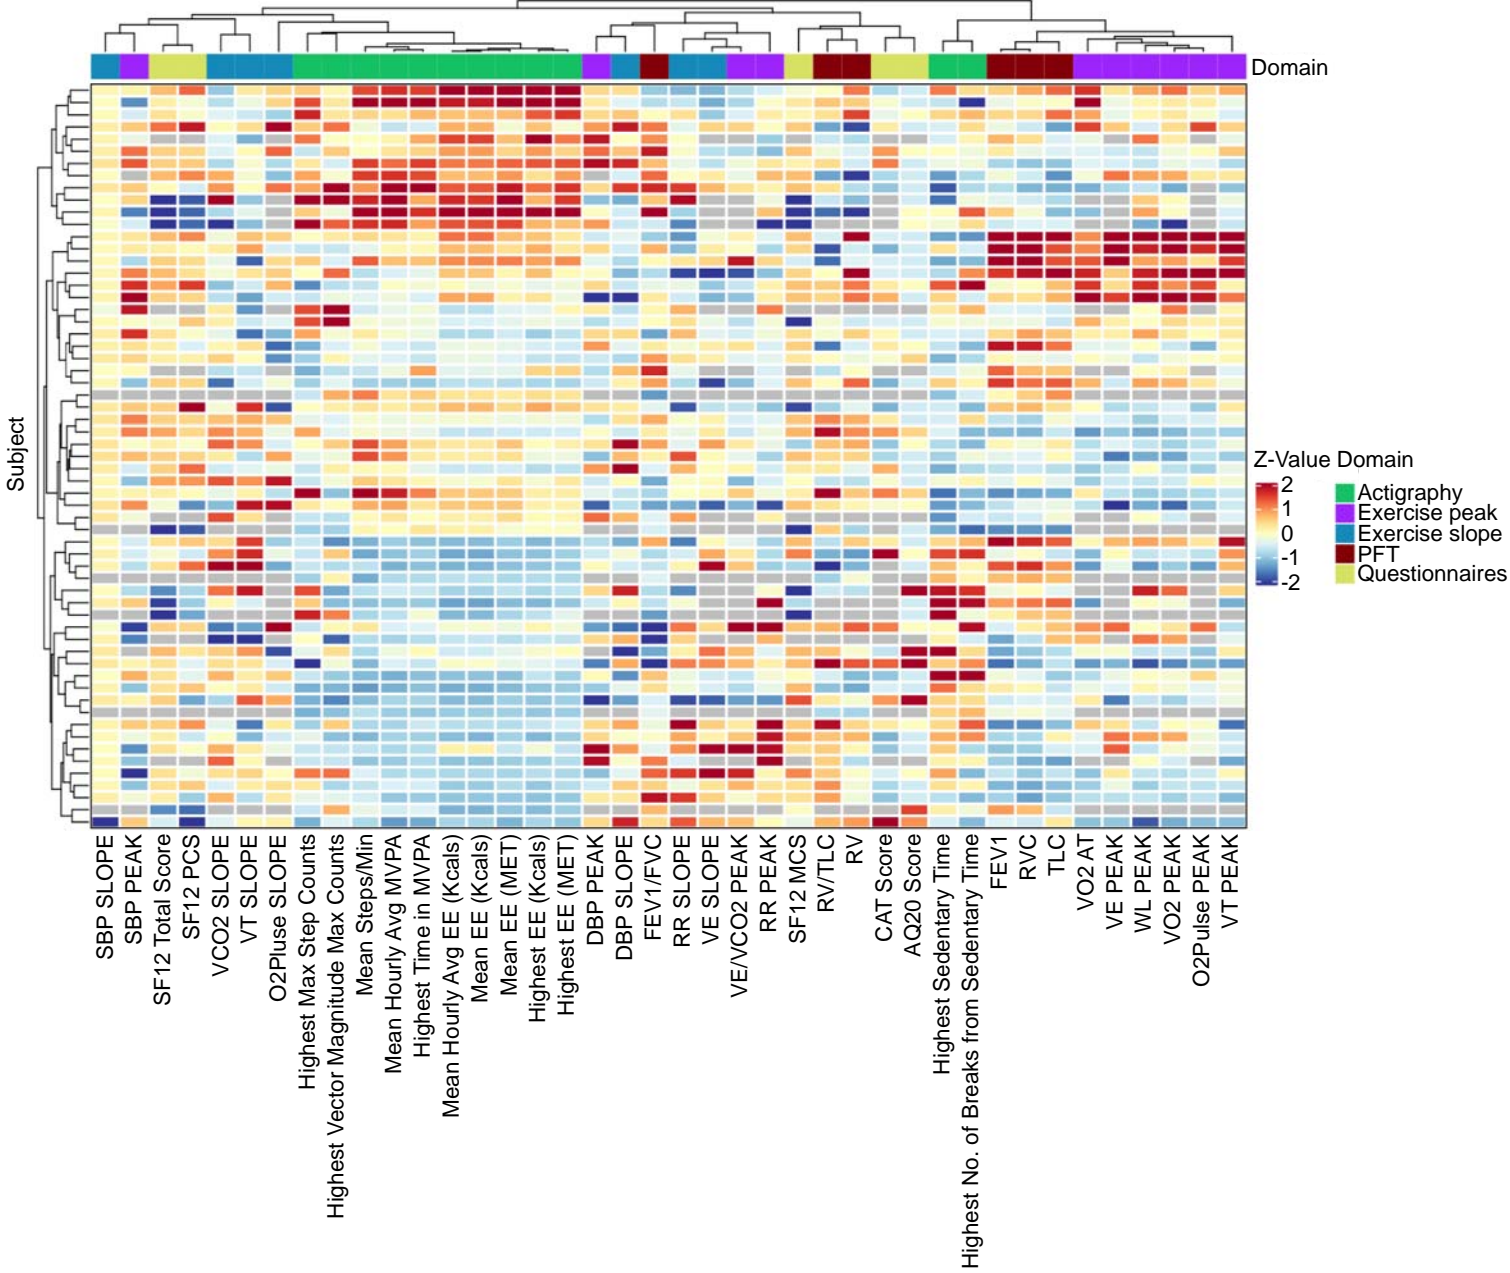

Source: https://medrxiv.org/content/10.1101/2021.05.01.21256454v1.full.pdf
